# Supplementary material for: Direct ring-opening of lactide with amines: application to the organo-catalyzed preparation of amide end-capped PLA and to the removal of residual lactide from PLA samples
Source: Royal Society of Chemistry journal article supplement (doi:10.1039/c4py00973h), 2014-10-20
Supplement: c4py00973h1.pdf [file c4py00973h1.pdf]

**Direct Ring-Opening of Lactide with Amines: Application to the  
Organo-catalyzed Preparation of Amide End-capped PLA and to the  
Removal of Residual Lactide from PLA Samples**

**Aurélie Alba, Olivier Thillaye du Boullay, Blanca Martin-Vaca, and Didier Bourissou**

**Supporting Information**

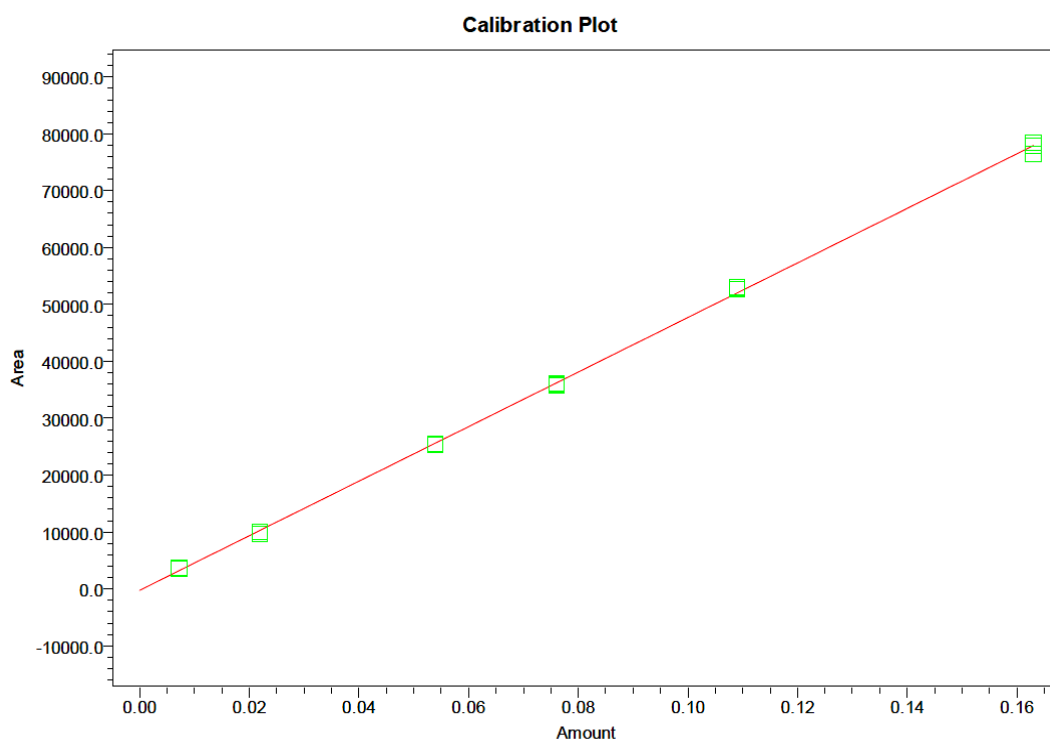

Peak: Lactide

|    | Name    | Level | X Value  | Response     | Calc. Value | % Deviation | Manual | Ignore |
|----|---------|-------|----------|--------------|-------------|-------------|--------|--------|
| 1  | Lactide |       | 0.007200 | 3592.235192  | 0.008022    | 11.412      | No     | No     |
| 2  | Lactide |       | 0.007200 | 3726.890829  | 0.008302    | 15.312      | No     | No     |
| 3  | Lactide |       | 0.007200 | 3625.995601  | 0.008092    | 12.390      | No     | No     |
| 4  | Lactide |       | 0.022000 | 9699.338751  | 0.020757    | -5.651      | No     | No     |
| 5  | Lactide |       | 0.022000 | 10024.467088 | 0.021435    | -2.570      | No     | No     |
| 6  | Lactide |       | 0.022000 | 9671.656553  | 0.020699    | -5.914      | No     | No     |
| 7  | Lactide |       | 0.054000 | 25559.164730 | 0.053829    | -0.317      | No     | No     |
| 8  | Lactide |       | 0.054000 | 25311.661100 | 0.053313    | -1.273      | No     | No     |
| 9  | Lactide |       | 0.054000 | 25305.533605 | 0.053300    | -1.296      | No     | No     |
| 10 | Lactide |       | 0.076000 | 36155.158356 | 0.075924    | -0.100      | No     | No     |
| 11 | Lactide |       | 0.076000 | 36010.160182 | 0.075622    | -0.497      | No     | No     |
| 12 | Lactide |       | 0.076000 | 35716.606653 | 0.075010    | -1.303      | No     | No     |
| 13 | Lactide |       | 0.109000 | 52944.279895 | 0.110934    | 1.775       | No     | No     |
| 14 | Lactide |       | 0.109000 | 52981.988656 | 0.111013    | 1.847       | No     | No     |
| 15 | Lactide |       | 0.109000 | 52745.373564 | 0.110520    | 1.394       | No     | No     |
| 16 | Lactide |       | 0.163000 | 78399.513246 | 0.164015    | 0.623       | No     | No     |
| 17 | Lactide |       | 0.163000 | 76466.904377 | 0.159985    | -1.849      | No     | No     |
| 18 | Lactide |       | 0.163000 | 77830.246978 | 0.162828    | -0.105      | No     | No     |

**Figure S1.** Calibration plot for the UPLC titration of lactide content in PLA samples

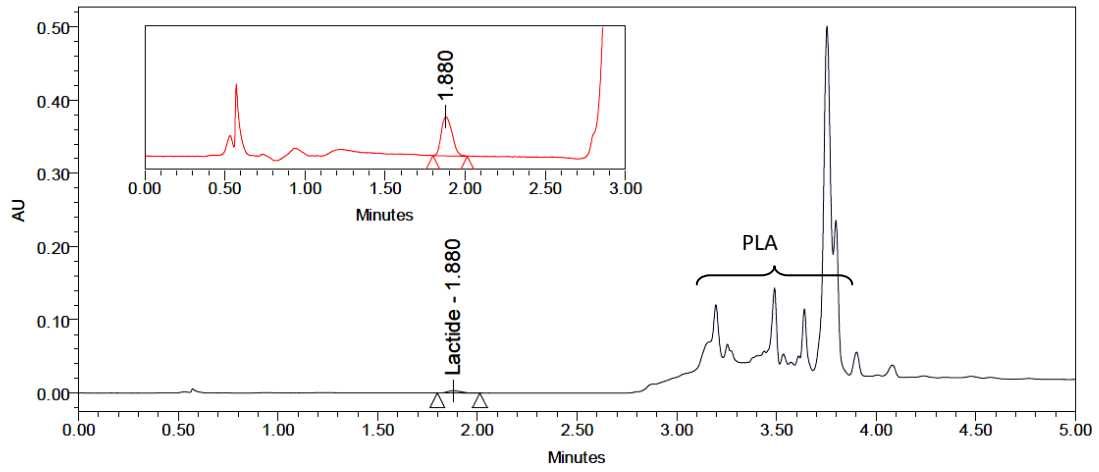

|   | Echantillon | Injection Volume (ul) | Injection | Nom     | RT    | Aire  | Concentration | Units |
|---|-------------|-----------------------|-----------|---------|-------|-------|---------------|-------|
| 1 | BM1 106     | 1.00                  | 1         | Lactide | 1.880 | 14098 | 0.02993       | mg/mL |
| 2 | BM1 106     | 1.00                  | 2         | Lactide | 1.873 | 13669 | 0.02903       | mg/mL |
| 9 | BM1 106     | 1.00                  | 1         | Lactide | 1.912 | 14135 | 0.03001       | mg/mL |

**Figure S2.** Titration of lactide content (0.46%) by UPLC in a PLA sample. Picks appearing between 2.8 and 4.3 minutes correspond to the PLA chains.

a)

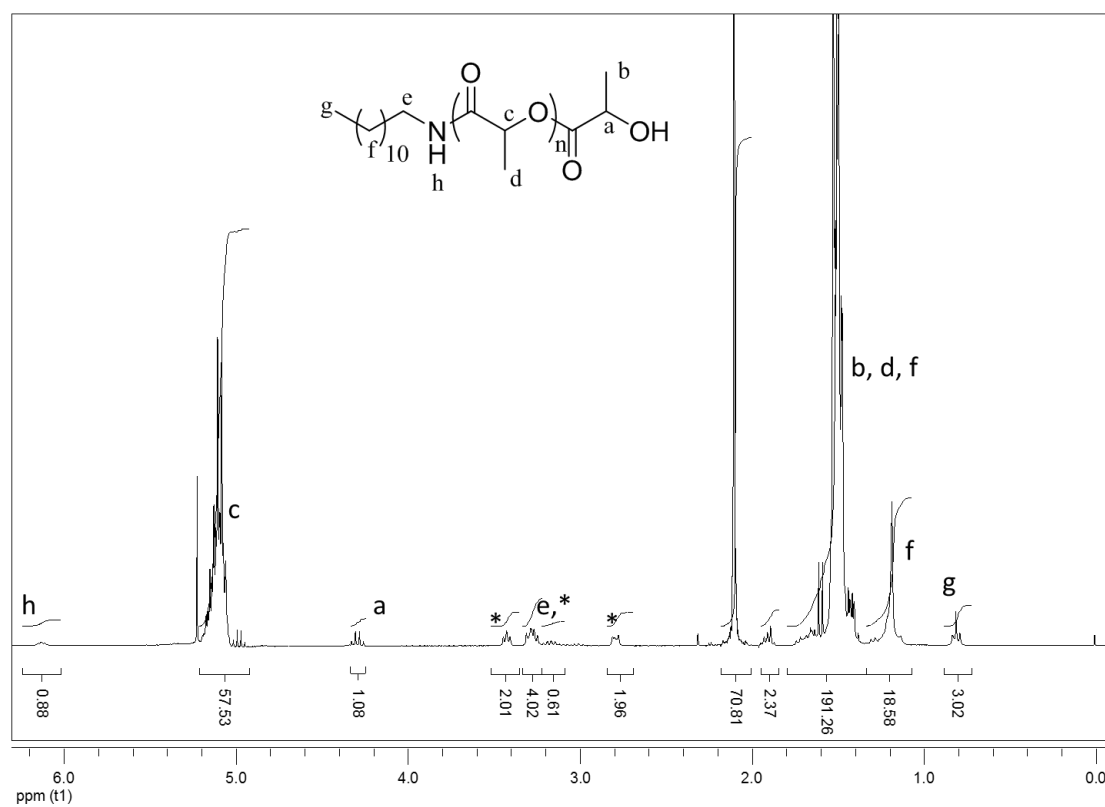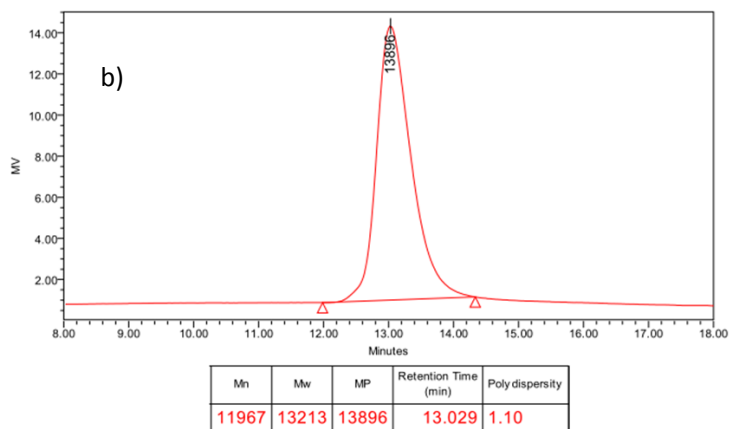

**Figure S3.** a) <sup>1</sup>H NMR spectra of dodecyl amine end-capped PLA formed after ROP of 30 equiv. of lactide (\*DBU). b) SEC trace of dodecyl amine end-capped PLA formed after ROP of 60 equiv. of lactide.

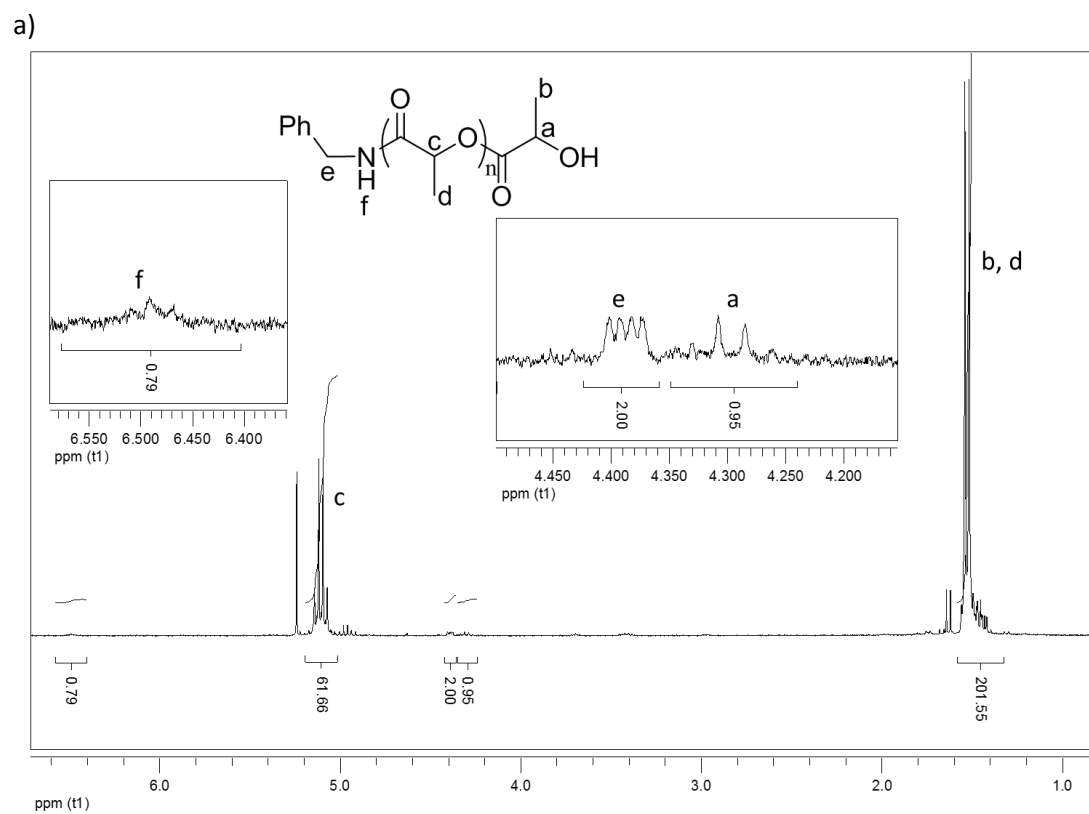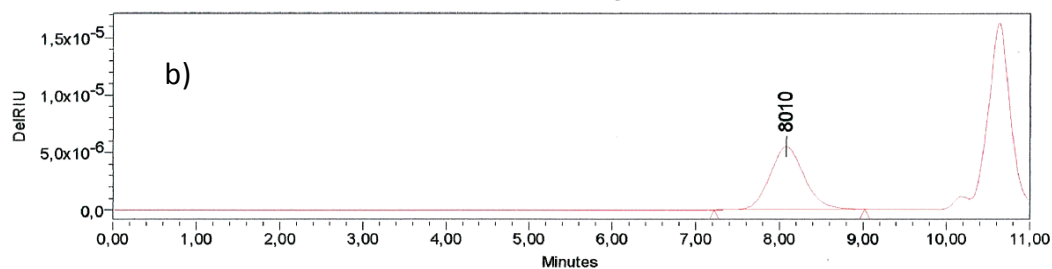

GPC Sample Results

|   | Retention Time | Mn   | Mw   | MP   | Polydispersity |
|---|----------------|------|------|------|----------------|
| 1 | 8,078          | 7263 | 8114 | 8010 | 1,12           |

**Figure S4.** a)  $^1\text{H}$  NMR spectra of benzyl amine end-capped PLA formed after ROP of 30 equiv. of lactide. b) SEC trace of benzyl amine end-capped PLA formed after ROP of 30 equiv. of lactide.

a)

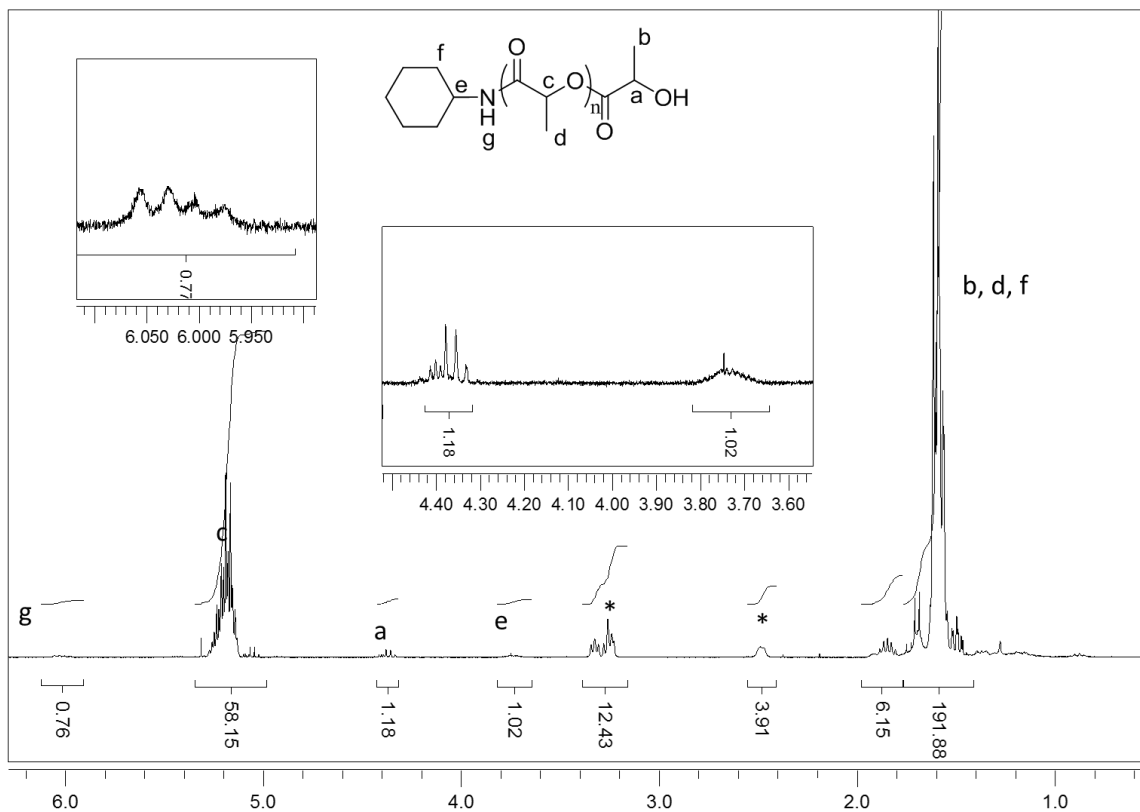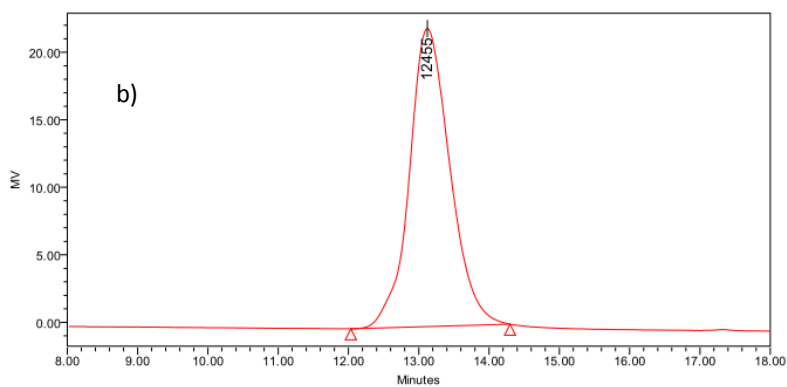

| Mn    | Mw    | MP    | Retention Time (min) | Poly dispersity |
|-------|-------|-------|----------------------|-----------------|
| 11280 | 12555 | 12455 | 13.123               | 1.11            |

**Figure S5.** a)  $^1\text{H}$  NMR spectra of cyclohexyl amine end-capped PLA formed after ROP of 30 equiv. of lactide (\*DBU). b) SEC trace of cyclohexyl amine end-capped PLA formed after ROP of 50 equiv. of lactide.

a)

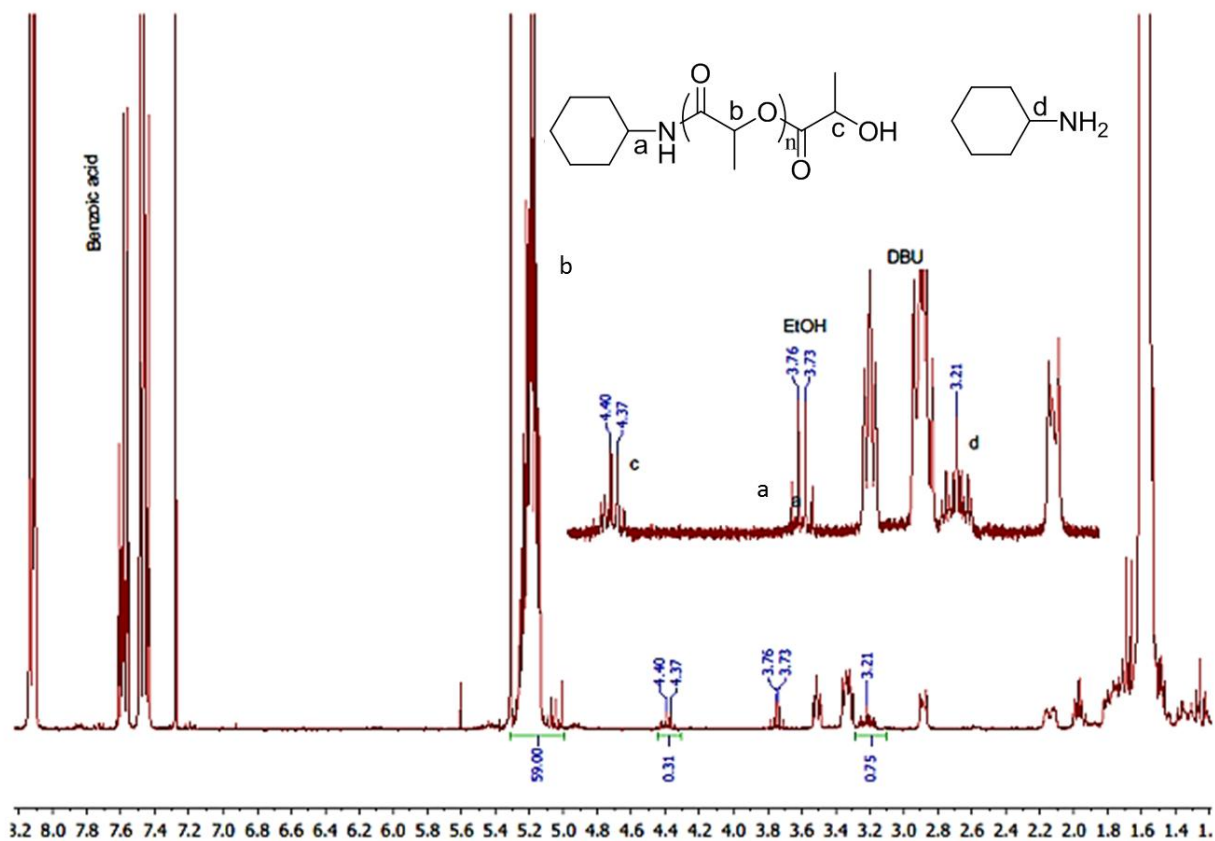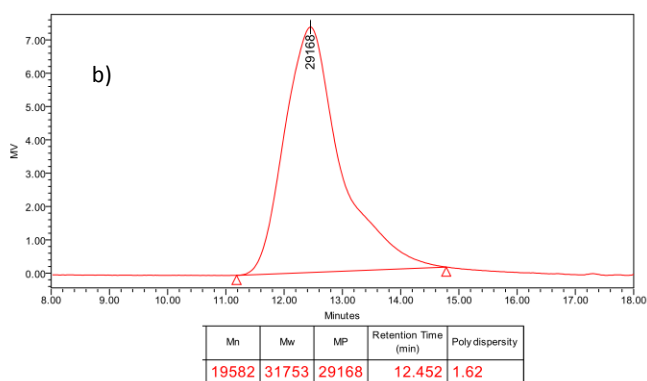

**Figure S6.**  $^1\text{H}$  NMR spectra of the reaction crude after ROP of 30 equiv. of lactide with simultaneous addition of DBU and cyclohexyl amine and catalyst deactivation by addition of benzoic acid. b) SEC trace of this reaction crude.

a)

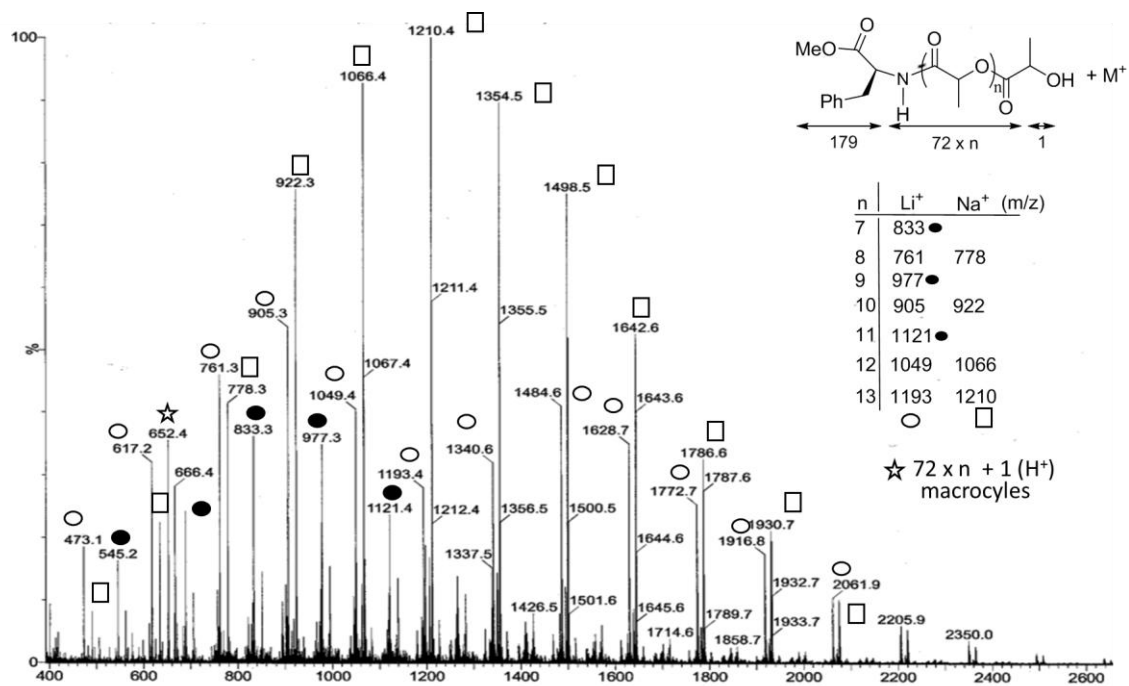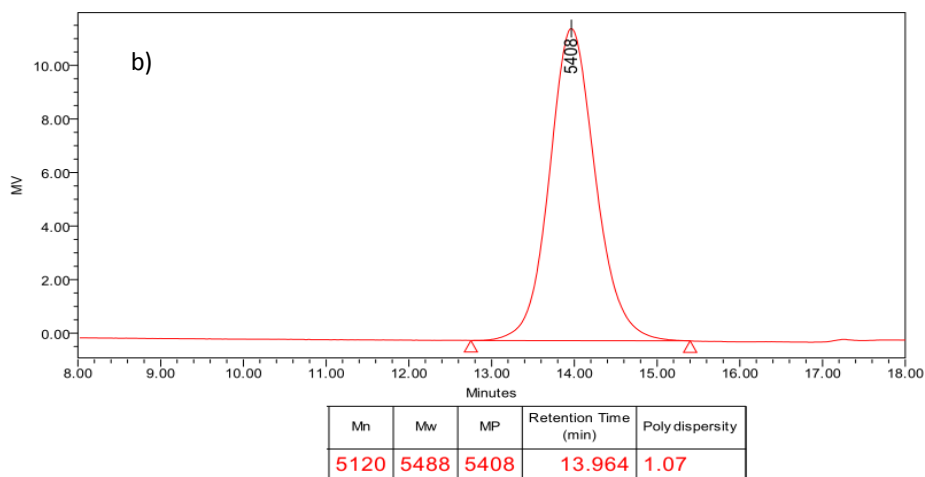

**Figure S7.** a) ESI-MS spectra of a methyl ester phenyl alanine end-capped PLA (DP = 10). b) SEC trace of a methyl ester phenyl alanine end-capped PLA (DP = 25)



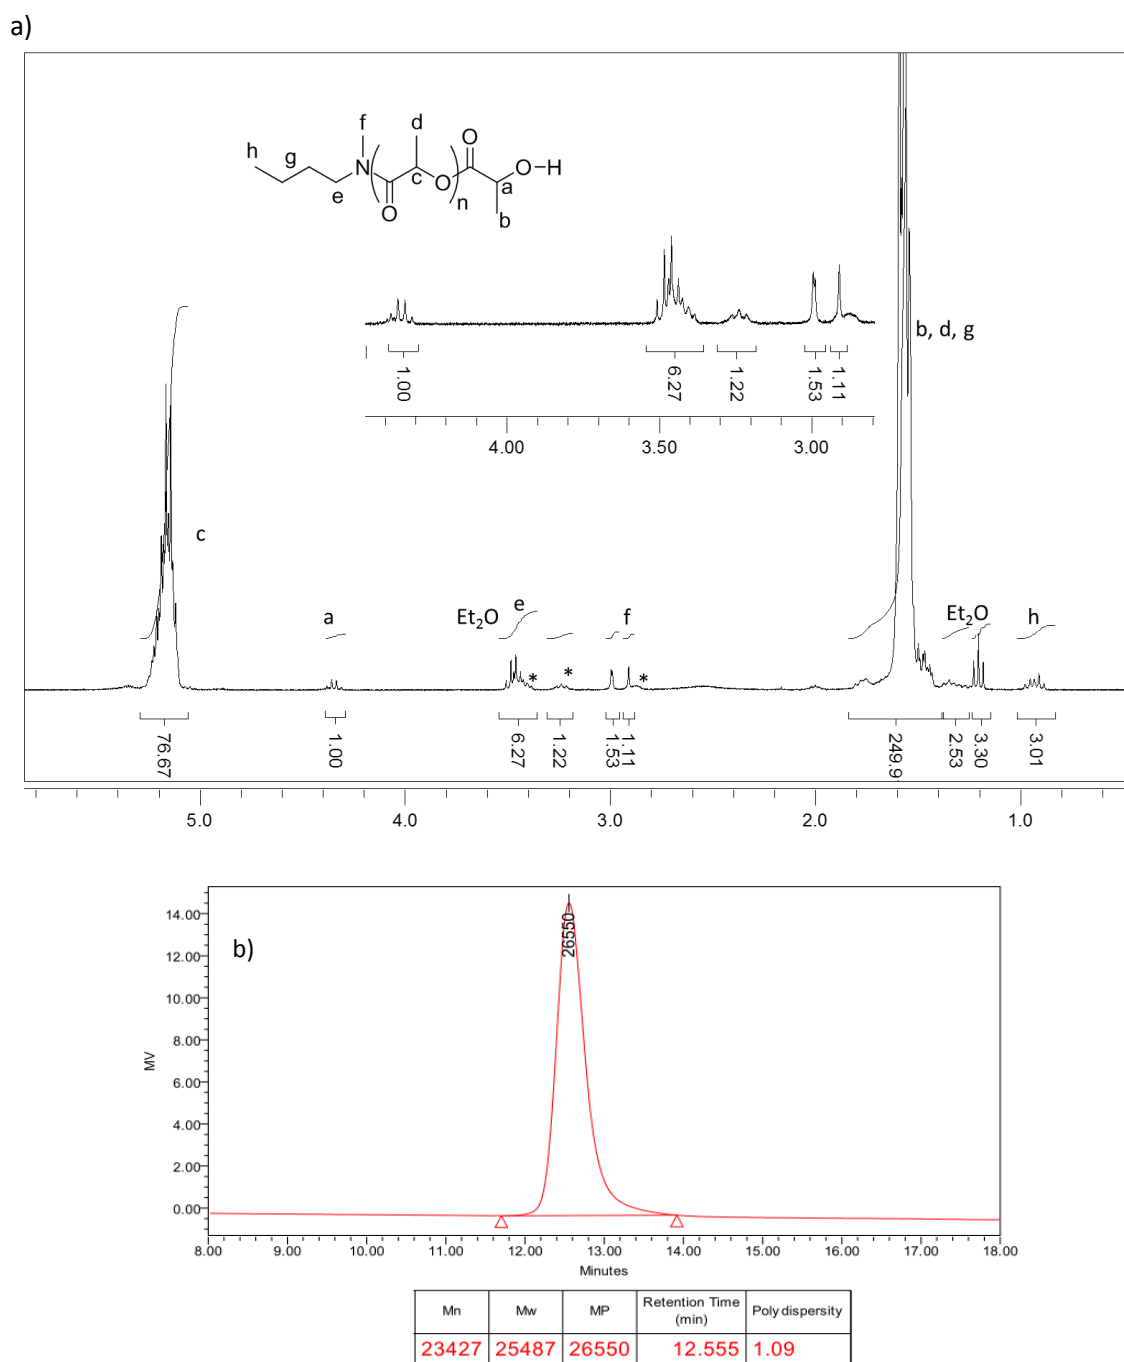

**Figure S8.** a) <sup>1</sup>H NMR spectrum of a *N*-methyl butylamine end-capped PLA (DP = 30). b) SEC trace of a *N*-methyl butylamine end-capped PLA (DP = 100).

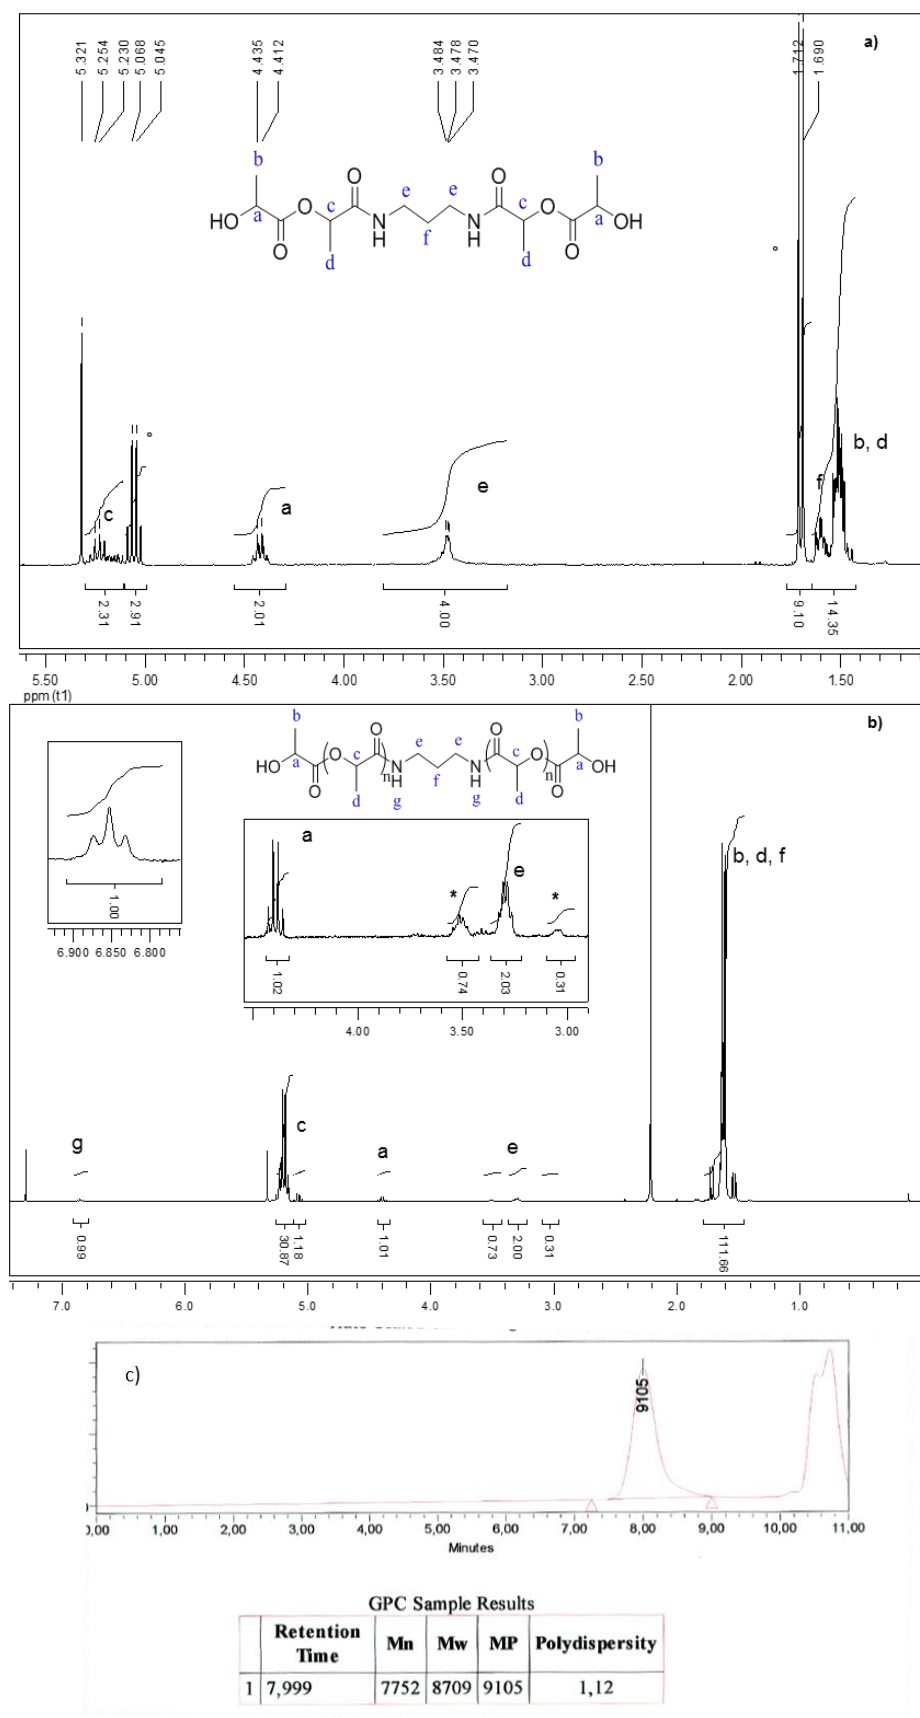

**Figure S9.** <sup>1</sup>H NMR spectra of: a) the adduct formed by reaction of propanediamine with 3.5 equiv of lactide, and b) telechelic PLA formed after ROP of 30 equiv. of lactide. ° unreacted lactide, \*DBU. c) SEC trace of a telechelic PLA formed after ROP of 30 equiv. of lactide with propanediamine

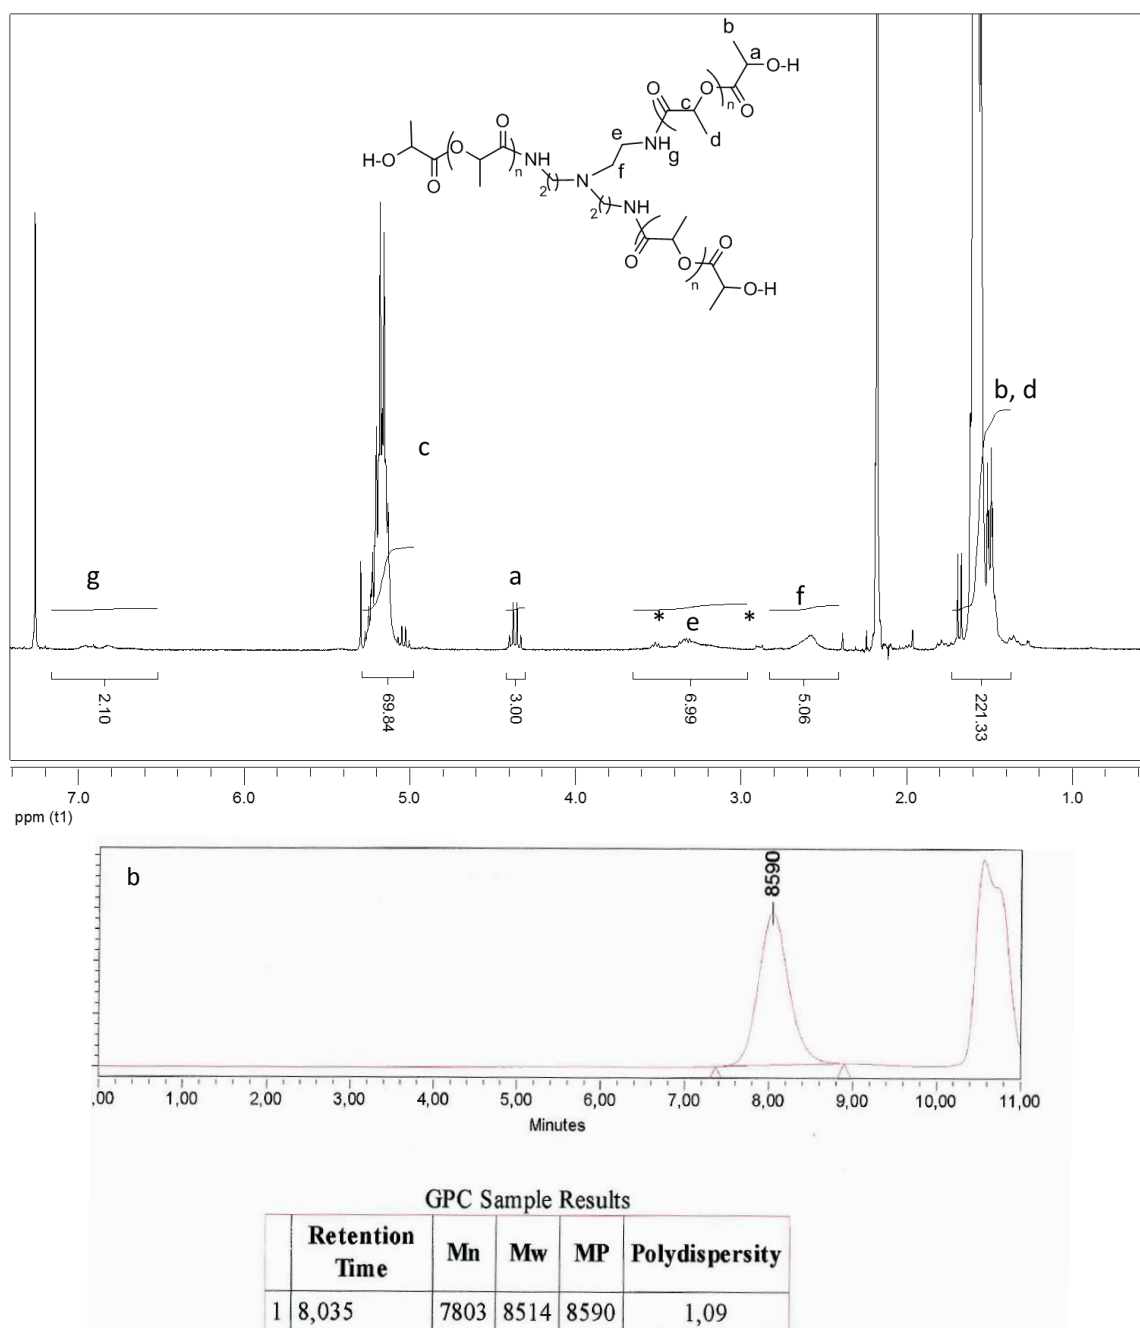

**Figure S10.** a)  $^1\text{H}$  NMR spectrum of the star shaped PLA formed after ROP of 30 equiv. of lactide with tris(2-aminoethyl)amine (\*DBU). b) SEC trace of the star shaped PLA formed after ROP of 30 equiv. of lactide with tris(2-aminoethyl)amine

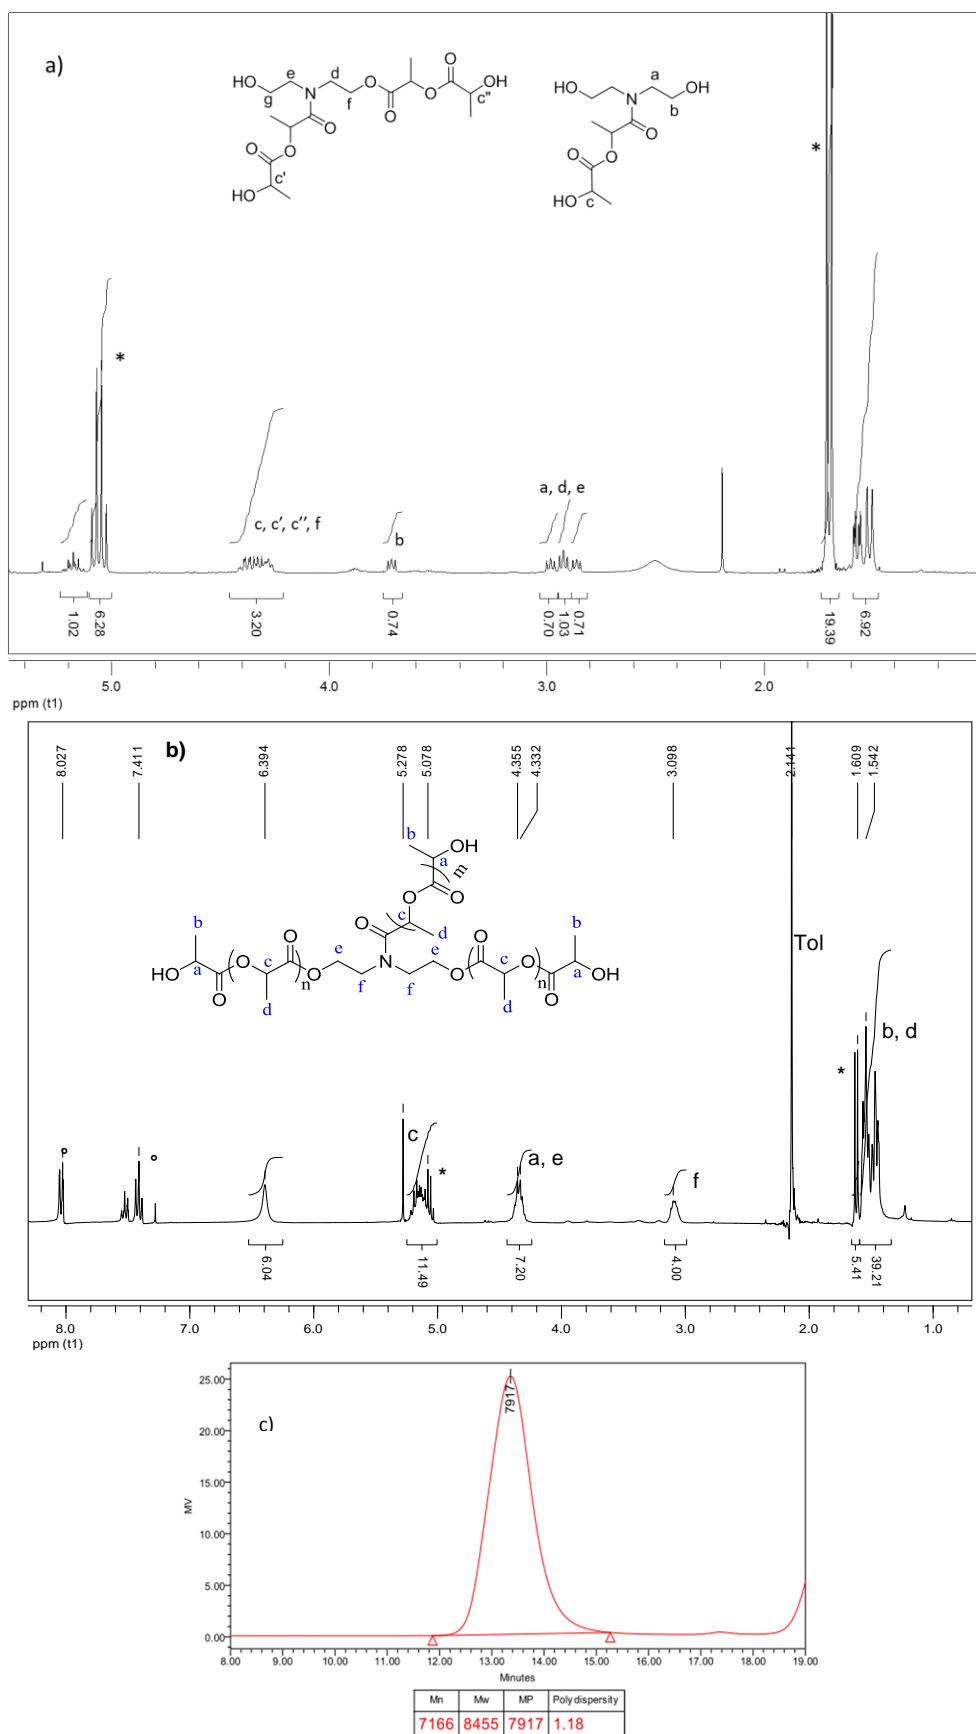

**Figure S11.**  $^1\text{H}$  NMR spectra of the adducts formed by reaction of diethanolamine with 3.5 equiv of lactide and b) the star shaped PLA formed after ROP of 7 equiv. of lactide with diethanolamine (\*lactide; ° Toluene). c) SEC trace of the star shaped PLA formed after ROP of 30 equiv. of lactide with diethanolamine

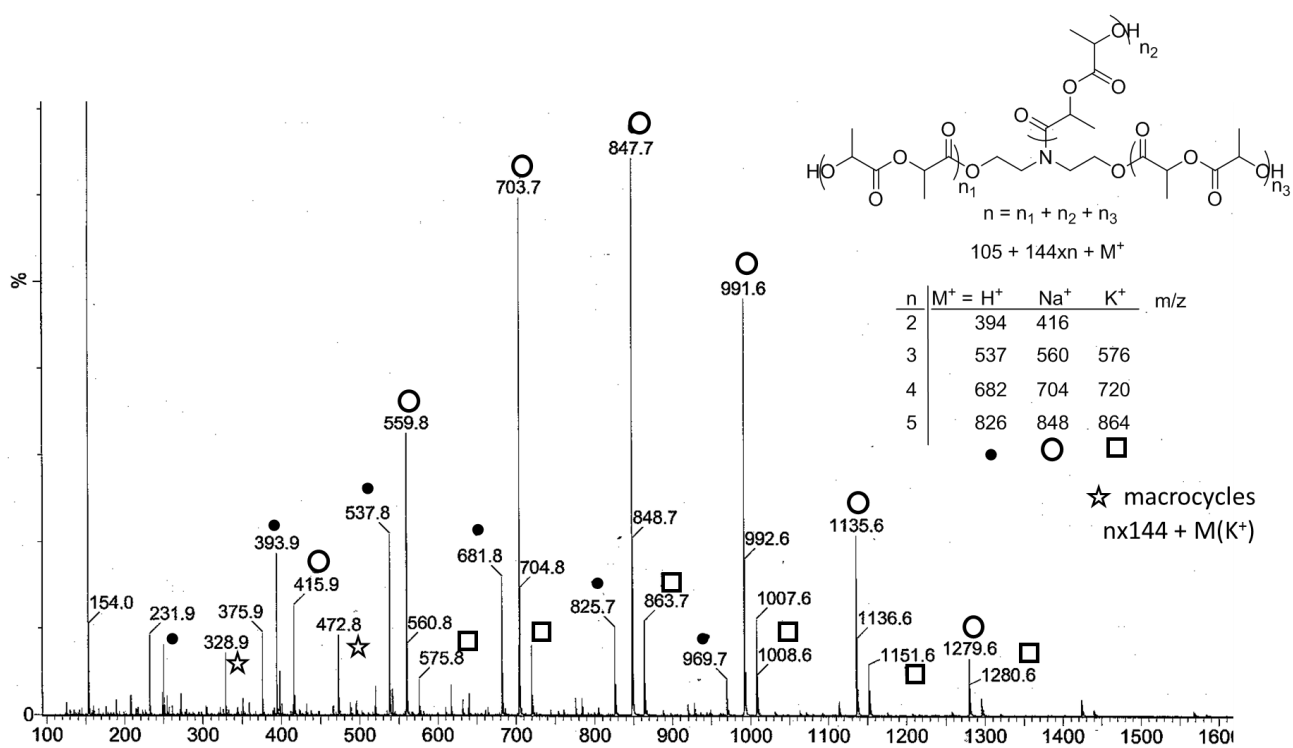

**Figure S12.** ESI-MS spectra of a star shaped PLA formed after ROP of 30 equiv. of lactide with diethanolamine

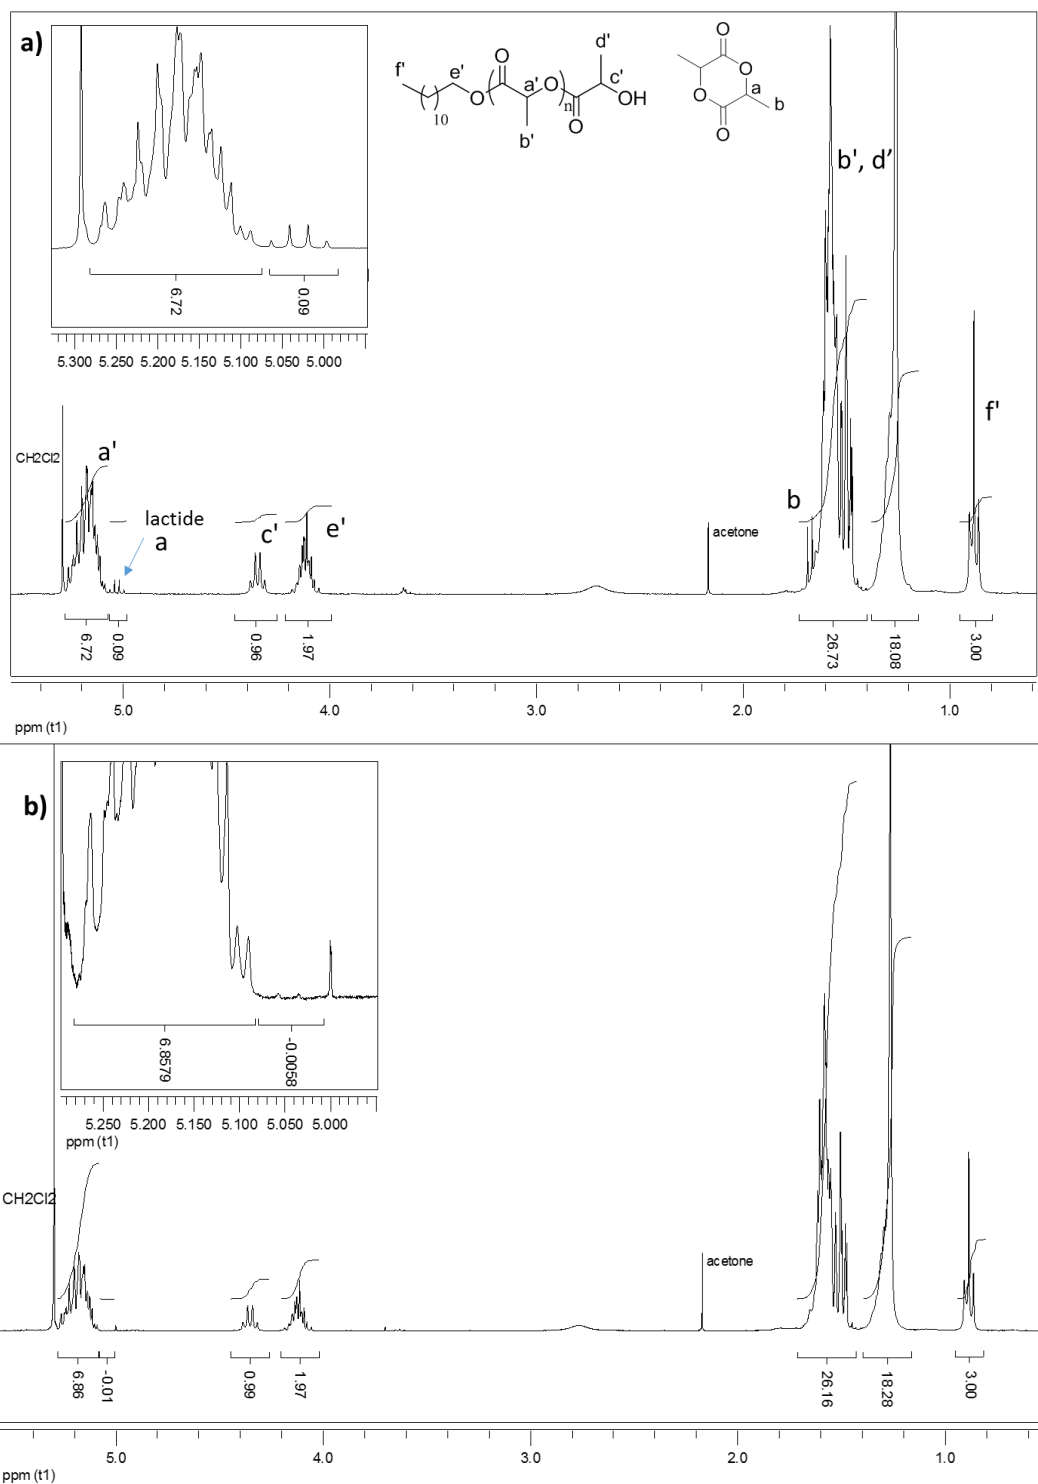

**Figure S13.**  $^1\text{H}$  NMR spectra of a dodecyl ester-end capped PLA sample before (a) /after (b) treatment with A

**Table S1.** SEC analysis of a PLA sample (BM106) before and after treatment with the supported amines

| PLA Sample                      | $M_n$            | $\mathcal{D}$ |
|---------------------------------|------------------|---------------|
| BM 1 106                        | 990              | 1.17          |
| BM 1 106 + Aldrich ( <b>A</b> ) | 1000             | 1.16          |
| BM 1 106 + TCI ( <b>B</b> )     | 810 <sup>1</sup> | 1.17          |
| BM 1 106 + Merck ( <b>C</b> )   | 980              | 1.18          |

<sup>1</sup>analysis carried out on a different high-speed liquid chromatograph, PLA sample before treatment  $M_n = 810$ .

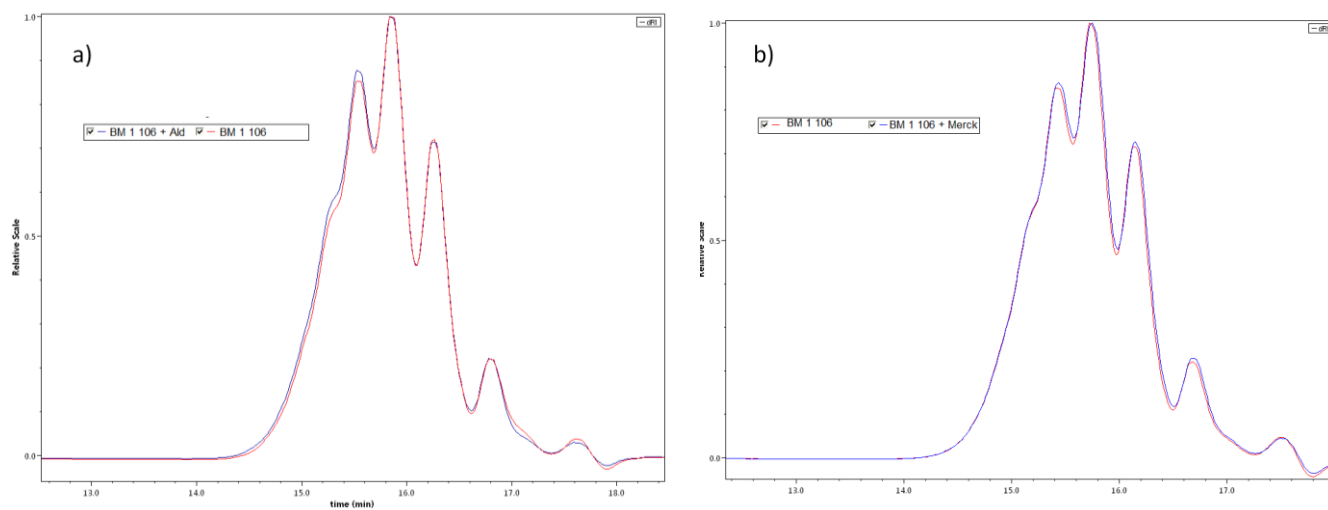

**Figure S14.** Overlay of SEC traces of a PLA sample before (red) /after (blue) treatment with **A** (a) and **C** (b)

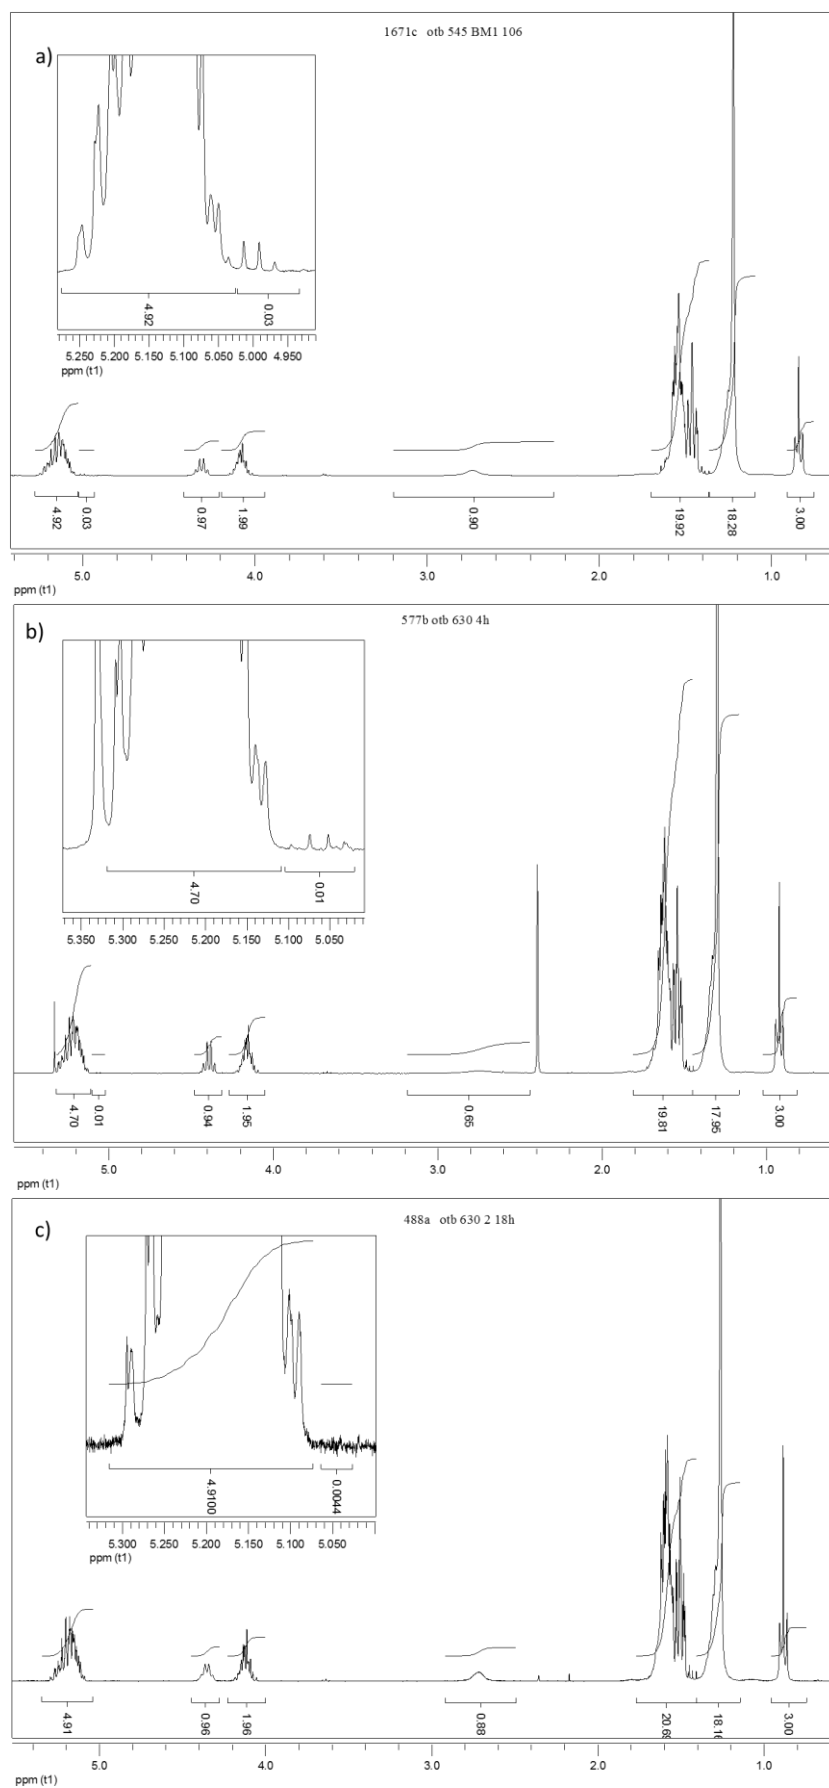

**Figure S15.**  $^1\text{H}$  NMR spectra of a dodecyl ester-end capped PLA sample before (a) and after 2h (b) and 4h (c) treatment with **A**



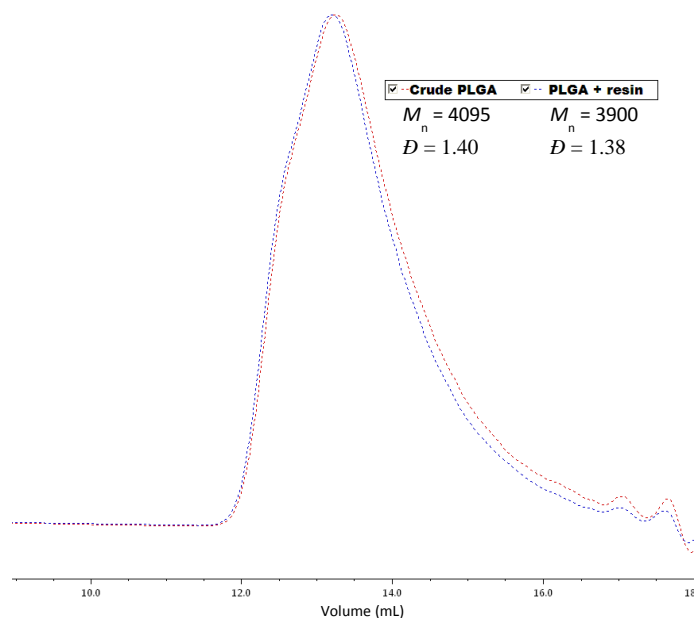

**Figure S16.** Overlay of SEC traces of a PLGA sample before (red) and after (blue) treatment with **B** during 18 h
